# Supplementary material for: Analysis of the Mycosporine-Like Amino Acid (MAA) Pattern of the Salt Marsh Red Alga Bostrychia scorpioides
Source: MDPI journal article supplement (doi:10.3390/md19060321), 2021-05-31
Supplement: s1 [file s1]

# **Analysis of the Mycosporine-Like Amino Acid (MAA) Pattern of the Salt Marsh Red Alga *Bostrychia scorpioides***

Maria Orfanoudaki<sup>a</sup>, Anja Hartmann<sup>a,\*</sup>, Julia Mayr, Félix L. Figueroa<sup>b</sup>, Julia Vega<sup>b</sup>, John West<sup>c</sup>, Ricardo Bermejo<sup>d</sup>, Christine Maggs, and Markus Ganzera<sup>a</sup>

<sup>a</sup> Institute of Pharmacy, Pharmacognosy, University of Innsbruck, Innrain 80-82, Innsbruck 6020, Austria; orfmaria@gmail.com (M.O.); anja.hartmann@uibk.ac.at (A.H.); julia\_mayr1@gmx.at (J. M.); markus.ganzera@uibk.ac.at (M.G.)

<sup>b</sup> University of Malaga, Institute of Blue Biotechnology and Development (IBYDA), Experimental Centre Grice-Hutchinson, Lomas de San Julian, 29004-Malaga, Spain; felix\_lopez@uma.es (F.L.F.); juliavega@uma.es (J.V.)

<sup>c</sup> School of BioSciences, University of Melbourne, Parkville, 3010 Victoria, Australia; jwest@unimelb.edu.au (J. W.)

<sup>d</sup> Earth and Ocean Sciences, School of Natural Sciences and Ryan Institute, National University of Ireland, Galway, H91 TK33, Ireland; ricardo.bermejo@uca.es (R. B.)

<sup>e</sup> Christine Maggs, School of Biological Sciences and Queen's University Marine Laboratory Portaferry, Queen's University Belfast, Northern Ireland, BT22 1PF, UK

\*Correspondence: anja.hartmann@uibk.ac.at (A.H.); Tel.: +43 512 507-58430

## Contents

|                                                                                                              |    |
|--------------------------------------------------------------------------------------------------------------|----|
| Table S1. Overview of the investigated <i>B. scorpioides</i> samples, their collection sites and dates. .... | 4  |
| Figure S1. <sup>1</sup> H NMR spectrum of bostrychine A in D <sub>2</sub> O at 400 MHz .....                 | 5  |
| Figure S2. COSY spectrum of bostrychine A in D <sub>2</sub> O at 400 MHz.....                                | 5  |
| Figure S3. HSQC spectrum of bostrychine A in D <sub>2</sub> O at 400 MHz.....                                | 6  |
| Figure S4. HMBC spectrum of bostrychine A in D <sub>2</sub> O at 400 MHz.....                                | 6  |
| Figure S5. <sup>13</sup> C NMR spectrum of bostrychine A in D <sub>2</sub> O at 100 MHz .....                | 7  |
| Figure S6. NOESY spectrum of bostrychine A in D <sub>2</sub> O at 400 MHz .....                              | 7  |
| Figure S7. UV spectrum of bostrychine A.....                                                                 | 8  |
| Figure S8. <sup>1</sup> H NMR spectrum of bostrychine B in D <sub>2</sub> O at 600 MHz .....                 | 8  |
| Figure S9. COSY spectrum of bostrychine B in D <sub>2</sub> O at 600 MHz .....                               | 9  |
| Figure S10. HSQC spectrum of bostrychine B in D <sub>2</sub> O at 600 MHz.....                               | 9  |
| Figure S11. HMBC spectrum of bostrychine B in D <sub>2</sub> O at 600 MHz.....                               | 10 |
| Figure S12. <sup>13</sup> C NMR spectrum of bostrychine B in D <sub>2</sub> O at 150 MHz .....               | 10 |
| Figure S13. UV spectrum of bostrychine B .....                                                               | 11 |
| Figure S14. <sup>1</sup> H NMR spectrum of bostrychine C in D <sub>2</sub> O at 600 MHz .....                | 11 |
| Figure S15. COSY spectrum of bostrychine C in D <sub>2</sub> O at 600 MHz.....                               | 12 |
| Figure S16. HSQC spectrum of bostrychine C in D <sub>2</sub> O at 600 MHz.....                               | 12 |
| Figure S17. HMBC spectrum of bostrychine C in D <sub>2</sub> O at 600 MHz.....                               | 13 |
| Figure S18. <sup>13</sup> C NMR spectrum of bostrychine C in D <sub>2</sub> O at 150 MHz .....               | 13 |
| Figure S19. UV spectrum of bostrychine C .....                                                               | 14 |
| Figure S20. <sup>1</sup> H NMR spectrum of bostrychine D in D <sub>2</sub> O at 600 MHz .....                | 14 |
| Figure S21. COSY spectrum of bostrychine D in D <sub>2</sub> O at 600 MHz.....                               | 15 |
| Figure S22. HSQC spectrum of bostrychine D in D <sub>2</sub> O at 600 MHz.....                               | 15 |
| Figure S23. HMBC spectrum of bostrychine D in D <sub>2</sub> O at 600 MHz.....                               | 16 |
| Figure S24. <sup>13</sup> C NMR spectrum of bostrychine D in D <sub>2</sub> O at 150 MHz .....               | 16 |
| Figure S25. UV spectrum of bostrychine D.....                                                                | 17 |
| Figure S26. <sup>1</sup> H NMR spectrum of bostrychine E in D <sub>2</sub> O at 600 MHz.....                 | 17 |
| Figure S27. COSY spectrum of bostrychine E in D <sub>2</sub> O at 600 MHz .....                              | 18 |
| Figure S28. <sup>13</sup> C NMR spectrum of bostrychine E in D <sub>2</sub> O at 150 MHz .....               | 18 |
| Figure S29. HSQC spectrum of bostrychine E in D <sub>2</sub> O at 600 MHz .....                              | 19 |
| Figure S30. HMBC spectrum of bostrychine E in D <sub>2</sub> O at 600 MHz .....                              | 19 |

|                                                                                               |    |
|-----------------------------------------------------------------------------------------------|----|
| Figure S31. NOESY spectrum of bostrychine E in D <sub>2</sub> O at 600 MHz .....              | 20 |
| Figure S32. UV spectrum of bostrychine E .....                                                | 20 |
| Figure S33. <sup>1</sup> H NMR spectrum of bostrychine F in D <sub>2</sub> O at 600 MHz.....  | 21 |
| Figure S34. COSY spectrum of bostrychine F in D <sub>2</sub> O at 600 MHz .....               | 21 |
| Figure S35. HSQC spectrum of bostrychine F in D <sub>2</sub> O at 600 MHz .....               | 22 |
| Figure S36. HMBC spectrum of bostrychine F in D <sub>2</sub> O at 600 MHz .....               | 22 |
| Figure S37. <sup>13</sup> C NMR spectrum of bostrychine F in D <sub>2</sub> O at 150 MHz..... | 23 |
| Figure S38. NOESY spectrum of bostrychine F in D <sub>2</sub> O at 600 MHz.....               | 23 |
| Figure S39. UV spectrum of bostrychine F .....                                                | 24 |

Table S1. Overview of the investigated *B. scorpioides* samples, their collection sites and dates.

| Sample | Collection Place                              | Collection Date | Origin  | Longitude  | Latitude    |
|--------|-----------------------------------------------|-----------------|---------|------------|-------------|
| 1      | Plouescat, France                             | 10/06/2019      | Field   | -4.222010  | 48.648812   |
| 2      | Sene, France                                  | 31/05/2019      | Field   | -2.743194  | 47.623058   |
| 3      | Hillion, France                               | 03/6/2019       | Field   | -2.676122  | 48.514435   |
| 4      | Saint Colombier, France                       | 31/05/2019      | Field   | -2.734889  | 47.552583   |
| 5      | Saint Armel, Chenal de Saint Leonard, France  | 31/05/2019      | Field   | -2.713022  | 47.589354   |
| 6      | Promenade des Rosvelec, Vannes, France        | 30/05/2019      | Field   | -2.748475  | 47.6209582  |
| 7      | Saint Armel, Passage A lile de Tascon, France | 31/05/2019      | Field   | -2.726754  | 47.569157   |
| 8      | Kerbourbon, Vannes, France                    | 30/05/2019      | Field   | -2.754591  | 47.6344224  |
| 9      | Plouescat, France                             | 14/06/2018      | Field   | -4.222010  | 48.648812   |
| 10     | Mi ño, Galicia, Spain                         | October 2019    | Field   | - 8.206211 | 43.352718   |
| 11     | Puente Lavaera, San Fernando, Cádiz, Spain    | 14/07/2019      | Field   | 6.191112   | 36.4575345  |
| 12     | Salt marsh of Palmones, Spain                 | 12/07/2019      | Field   | -5.439694  | 36.173694   |
| 13     | Burnham-on-Crouch, Essex, United Kingdom      | 01/09/2019      | Field   | 0.843817   | 51.623467   |
| 14     | Finavarra Demesne, Co. Clare, Ireland         | 03/09/2015      | Culture | -9.091785  | 53.147615   |
| 15     | Lettermore, Ireland                           | October 2019    | Field   | - 9.711216 | 53.2983547  |
| 16     | Tolka, Ireland                                | October 2019    | Field   | - 6.157918 | 53.37177582 |
| 17     | Argideen-Timoleague, Ireland                  | October 2019    | Field   | - 8.764898 | 51.641662   |



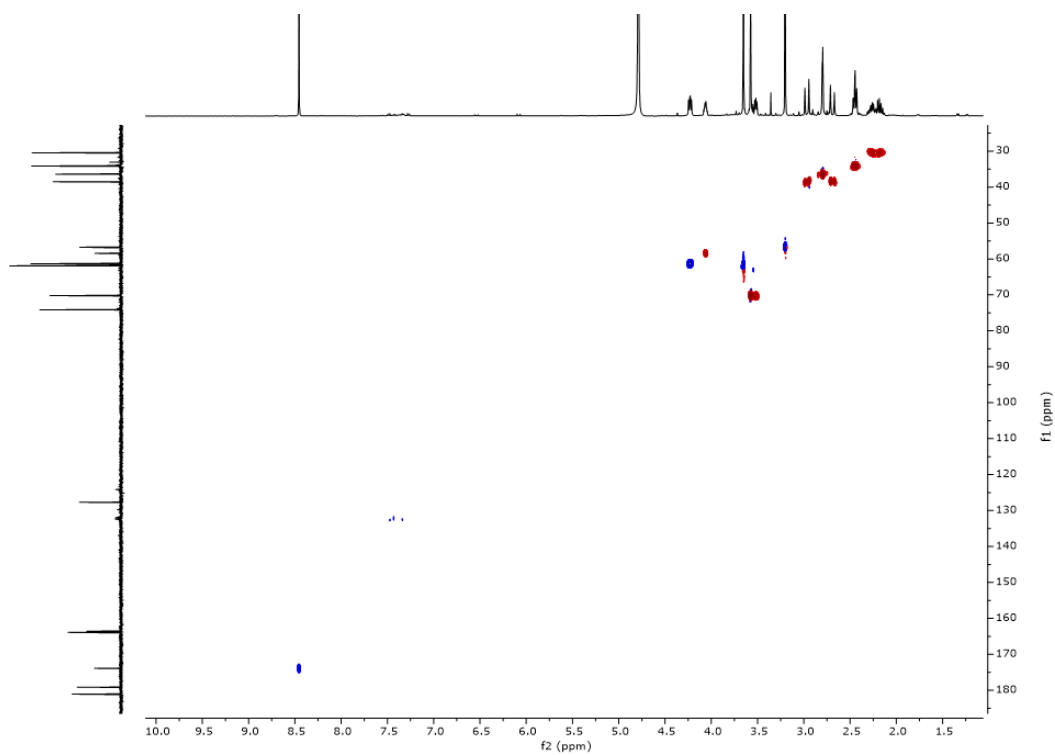

Figure S3. HSQC spectrum of bostrychine A in  $\text{D}_2\text{O}$  at 400 MHz

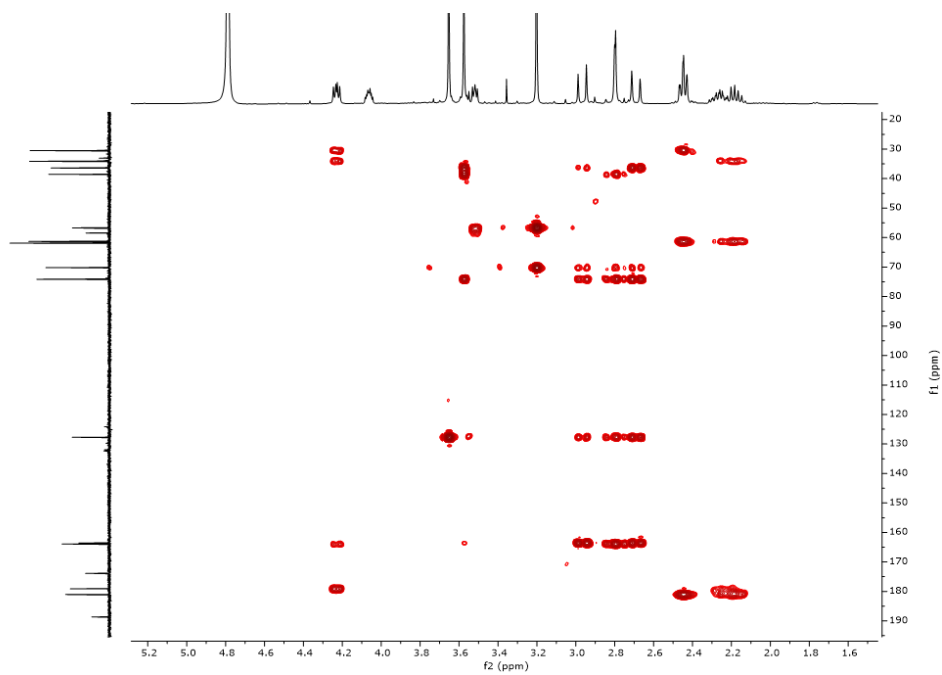

Figure S4. HMBC spectrum of bostrychine A in  $\text{D}_2\text{O}$  at 400 MHz

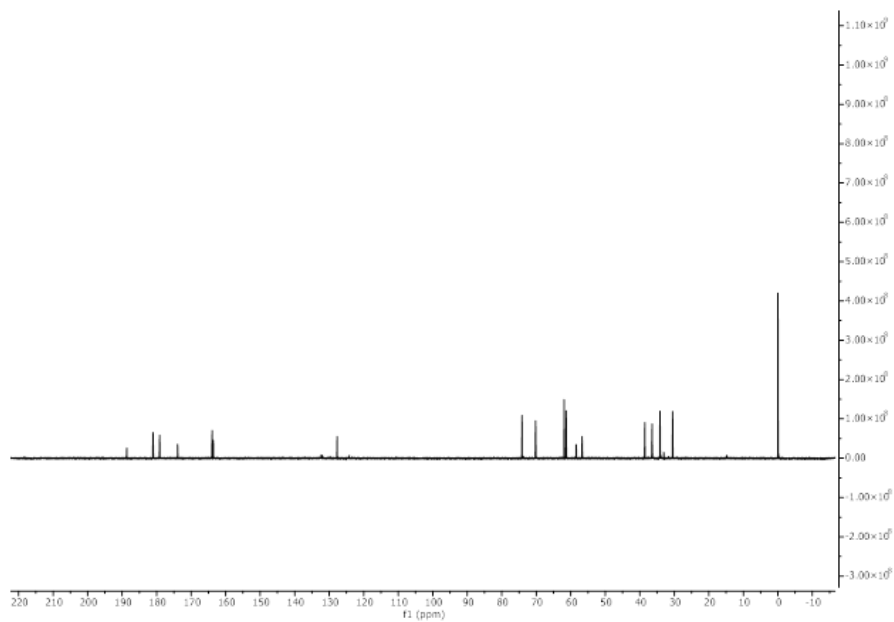

Figure S5.  $^{13}\text{C}$  NMR spectrum of bostrychine A in  $\text{D}_2\text{O}$  at 100 MHz

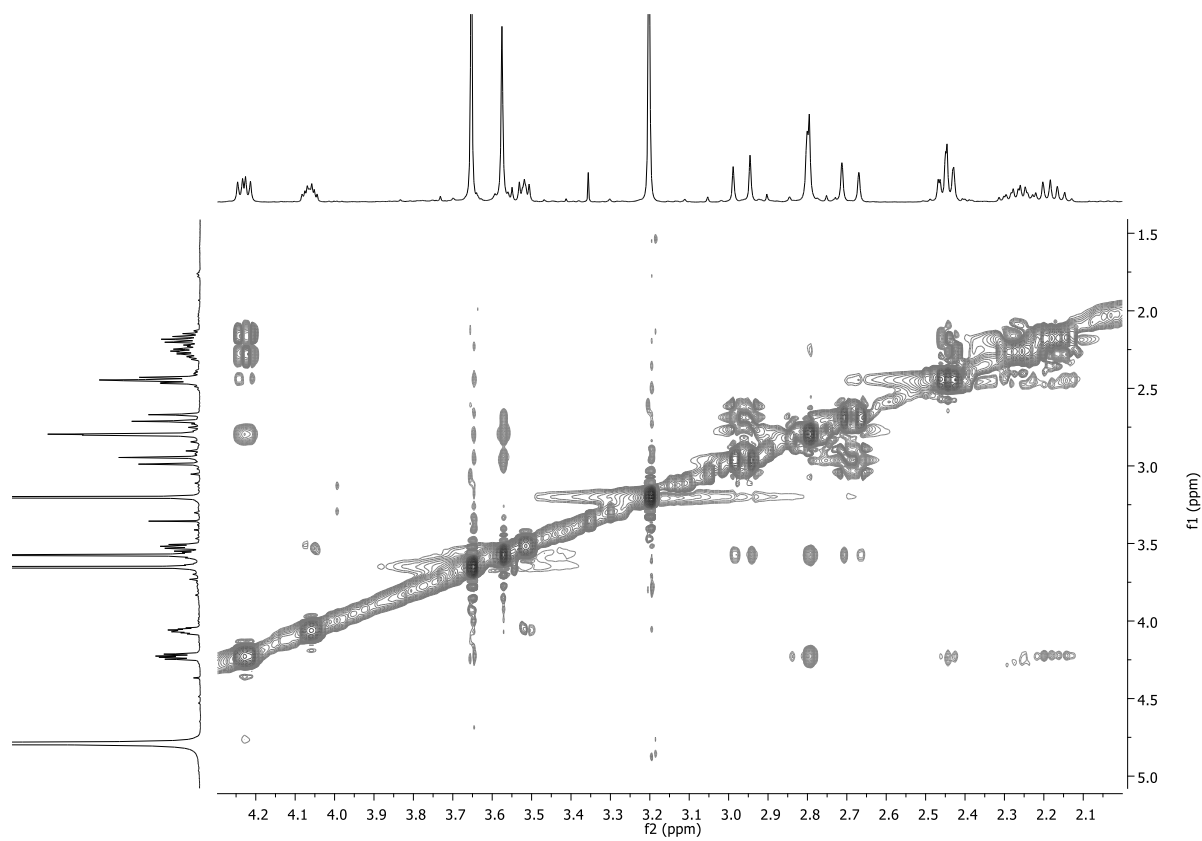

Figure S6. NOESY spectrum of bostrychine A in  $\text{D}_2\text{O}$  at 400 MHz

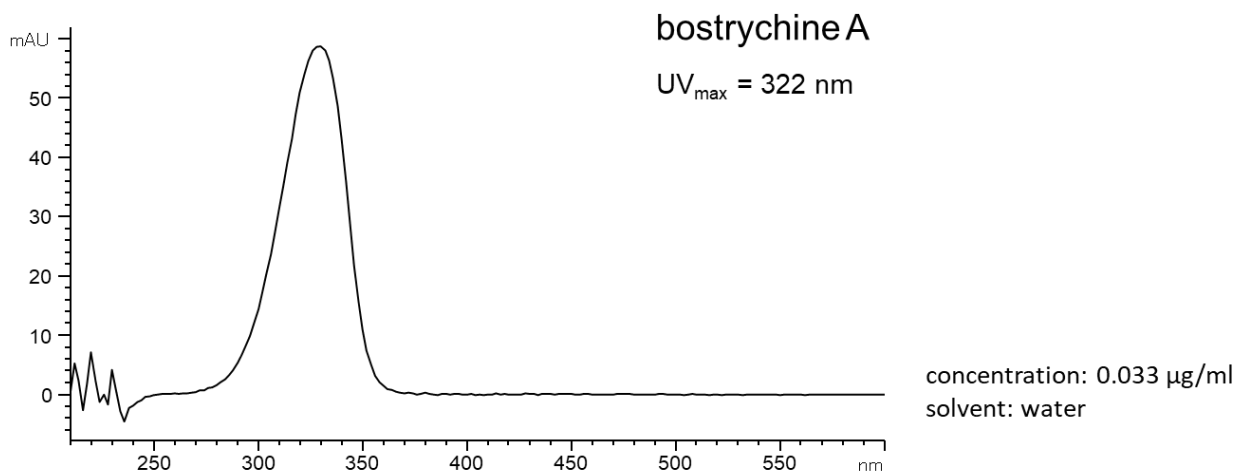

Figure S7. UV spectrum of bostrychine A

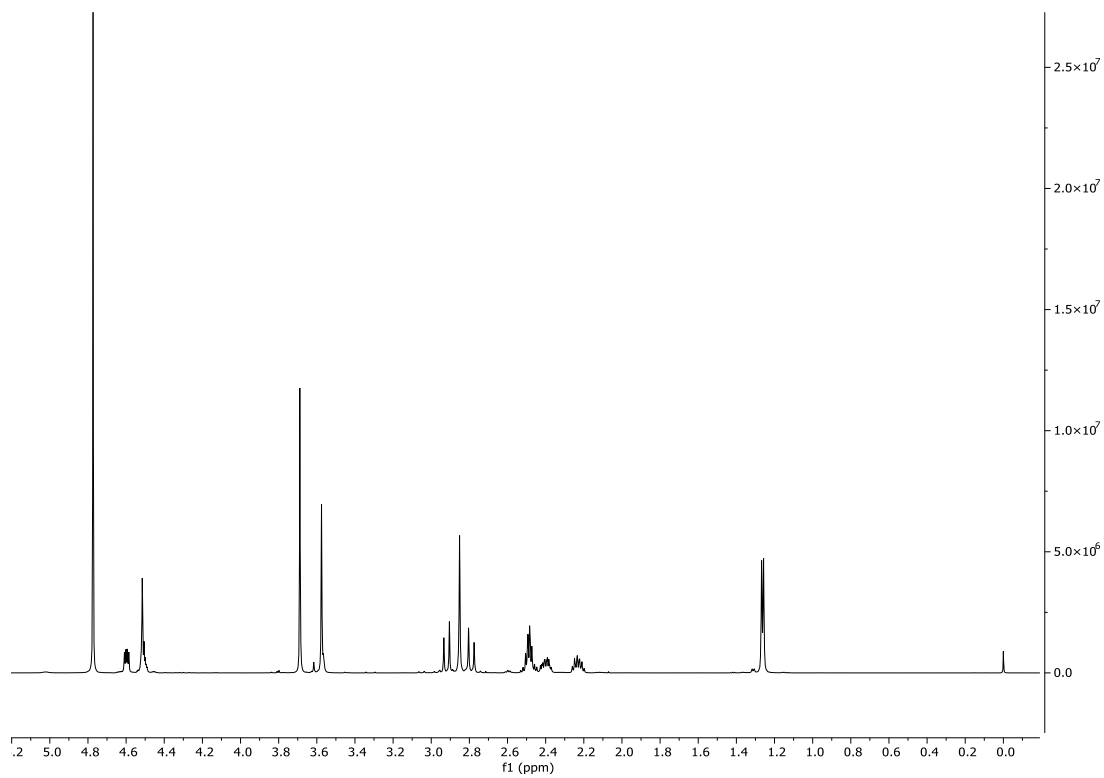

Figure S8.  $^1\text{H}$  NMR spectrum of bostrychine B in  $\text{D}_2\text{O}$  at 600 MHz



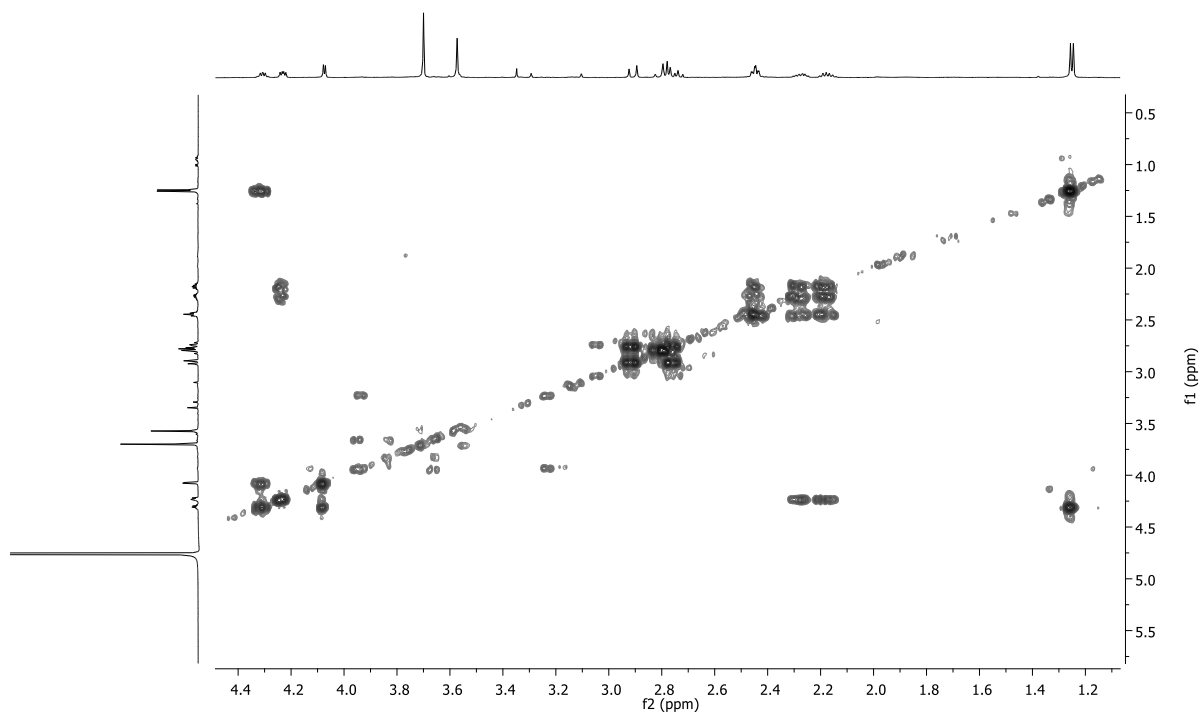

Figure S9. COSY spectrum of bostrychine B in D<sub>2</sub>O at 600 MHz

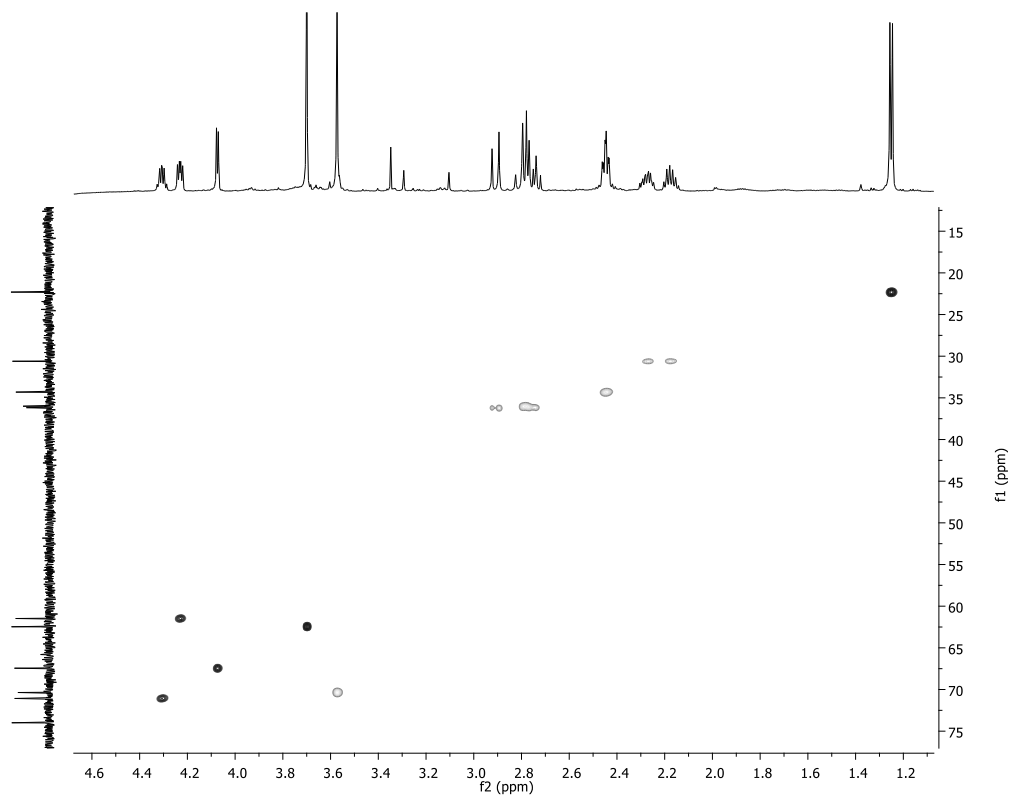

Figure S10. HSQC spectrum of bostrychine B in D<sub>2</sub>O at 600 MHz

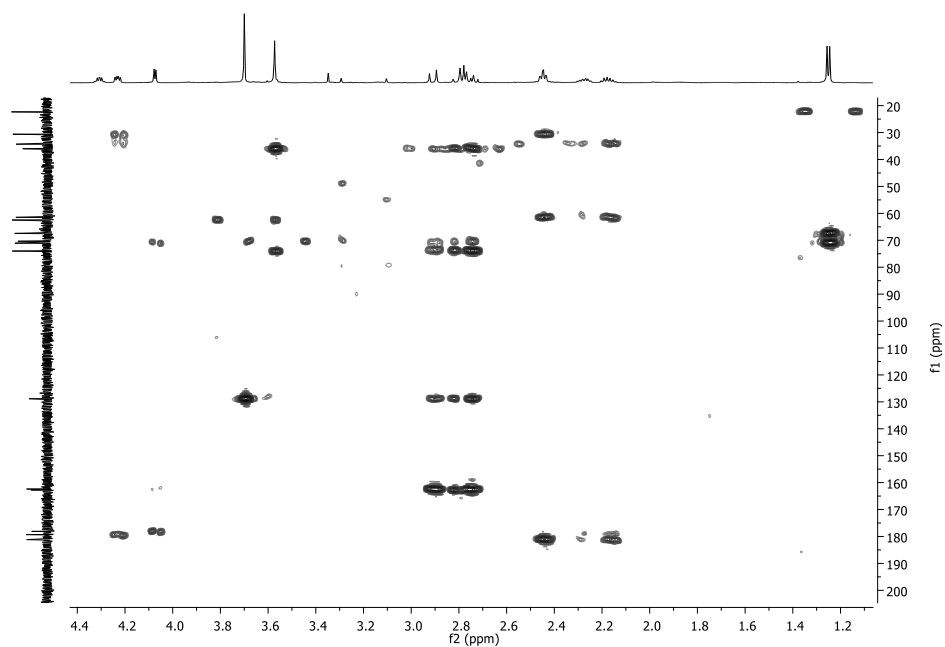

Figure S11. HMBC spectrum of bostrychine B in D<sub>2</sub>O at 600 MHz

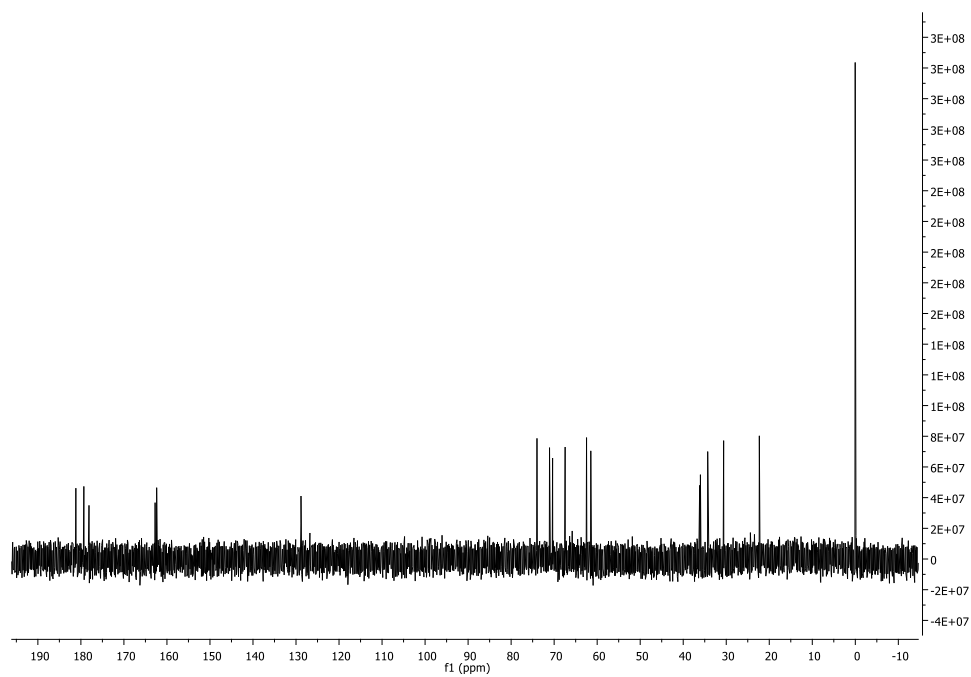

Figure S12. <sup>13</sup>C NMR spectrum of bostrychine B in D<sub>2</sub>O at 150 MHz

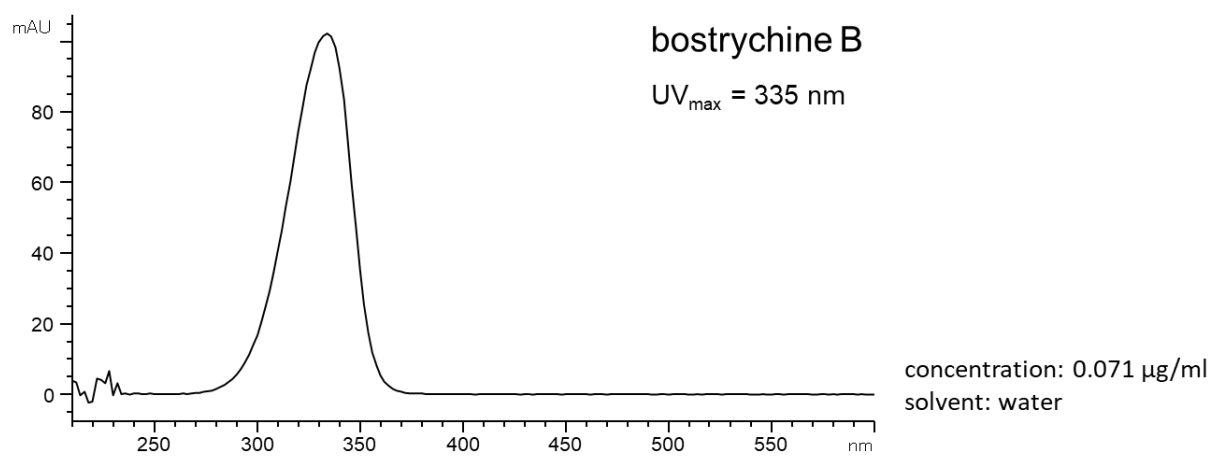

Figure S13. UV spectrum of bostrychine B

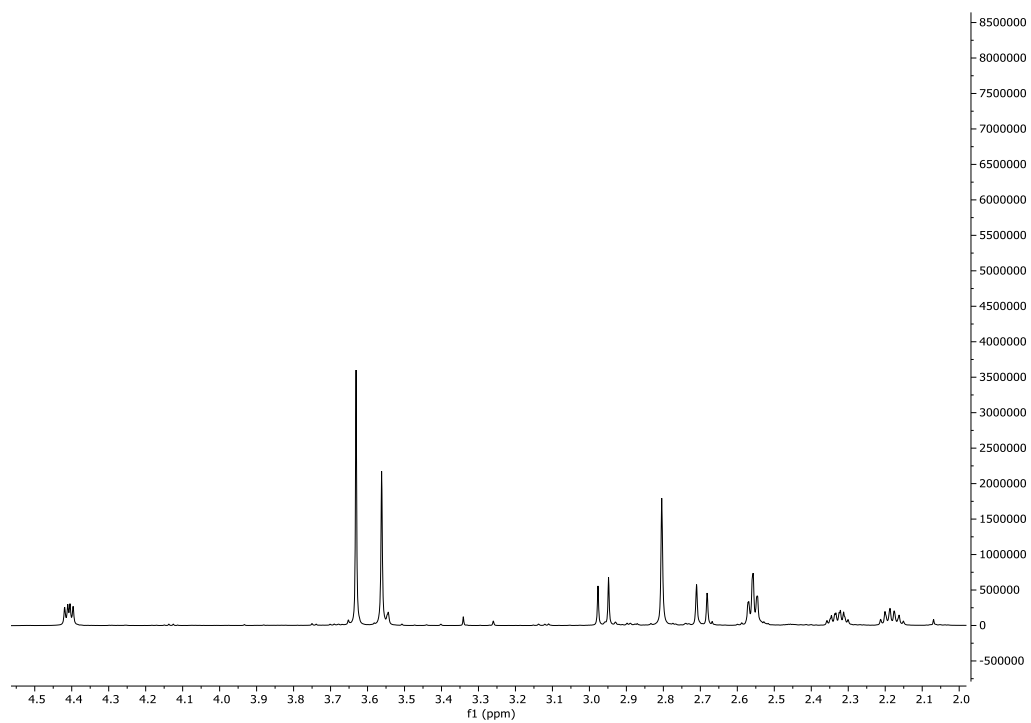

Figure S14.  $^1\text{H}$  NMR spectrum of bostrychine C in  $\text{D}_2\text{O}$  at 600 MHz

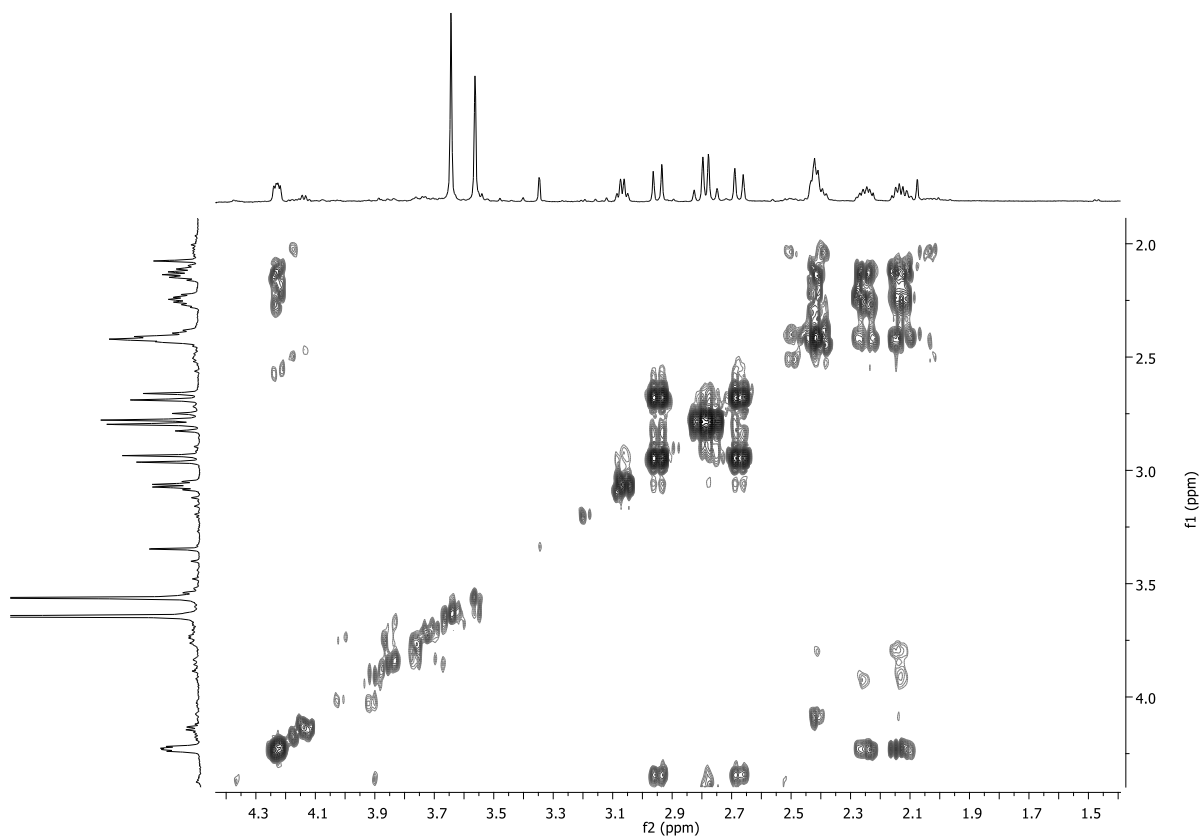

Figure S15. COSY spectrum of bostrychine C in D<sub>2</sub>O at 600 MHz

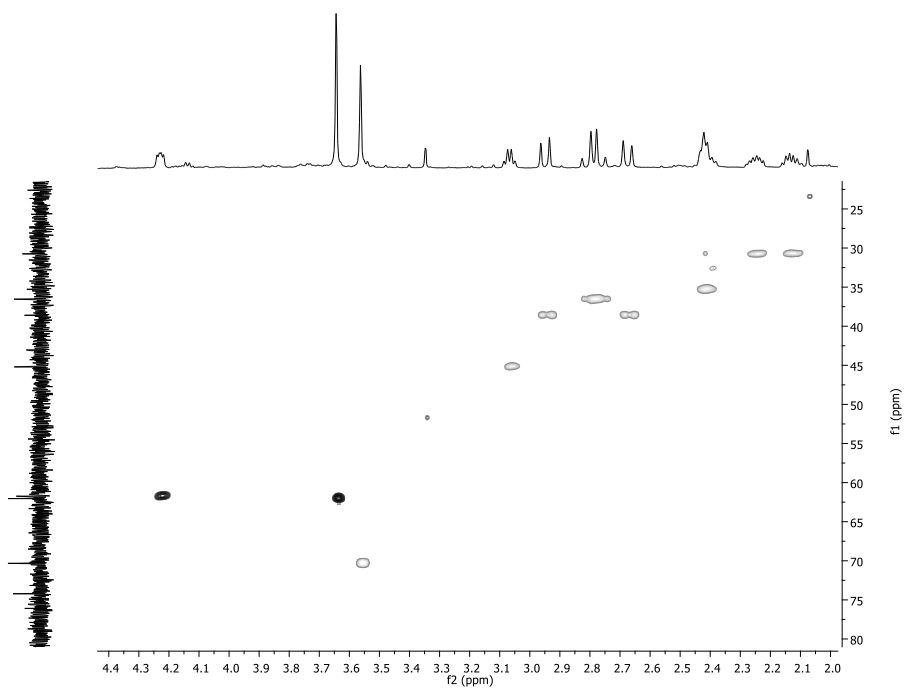

Figure S16. HSQC spectrum of bostrychine C in D<sub>2</sub>O at 600 MHz

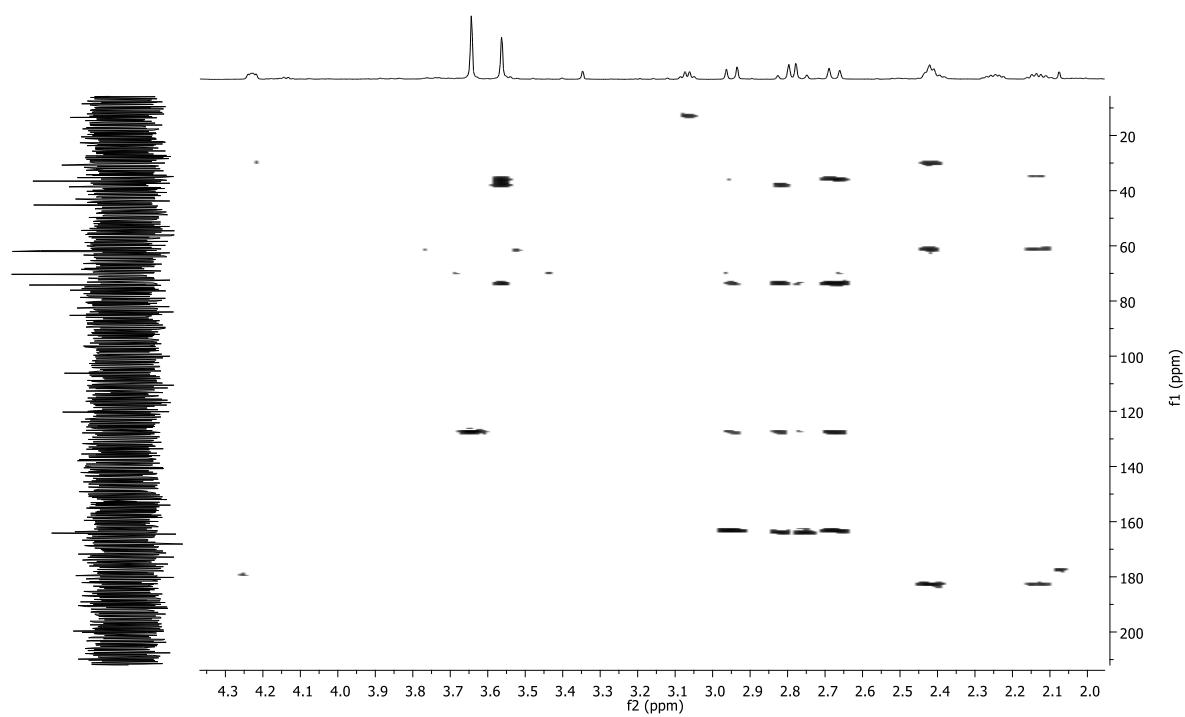

Figure S17. HMBC spectrum of bostrychine C in D<sub>2</sub>O at 600 MHz

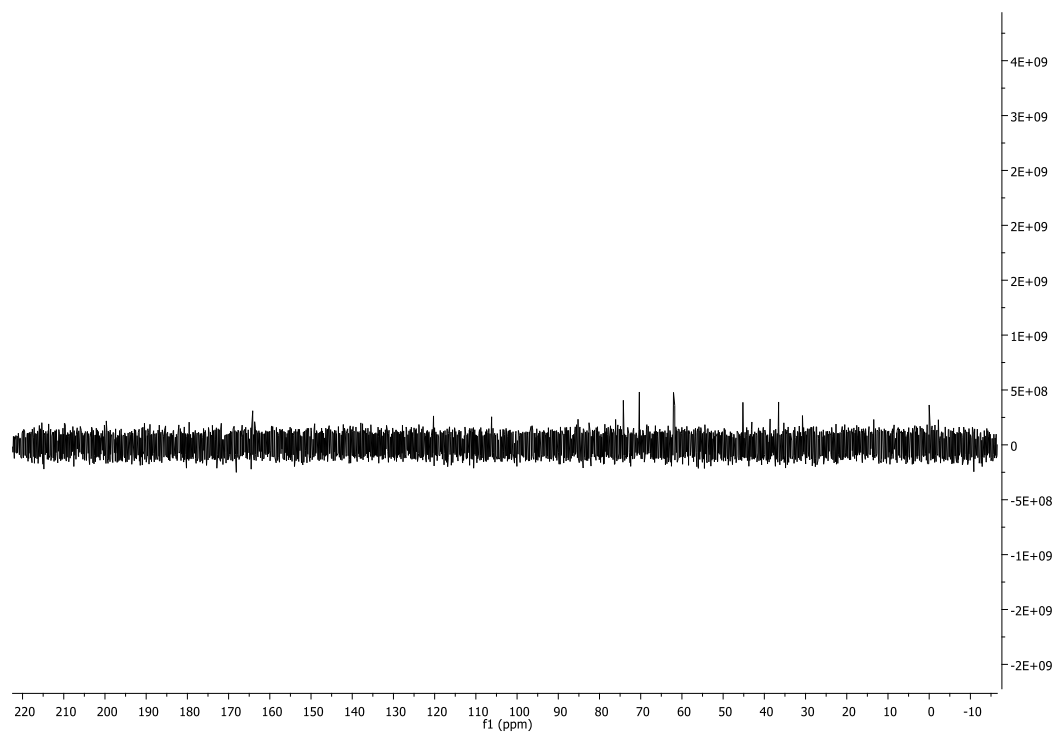

Figure S18. <sup>13</sup>C NMR spectrum of bostrychine C in D<sub>2</sub>O at 150 MHz

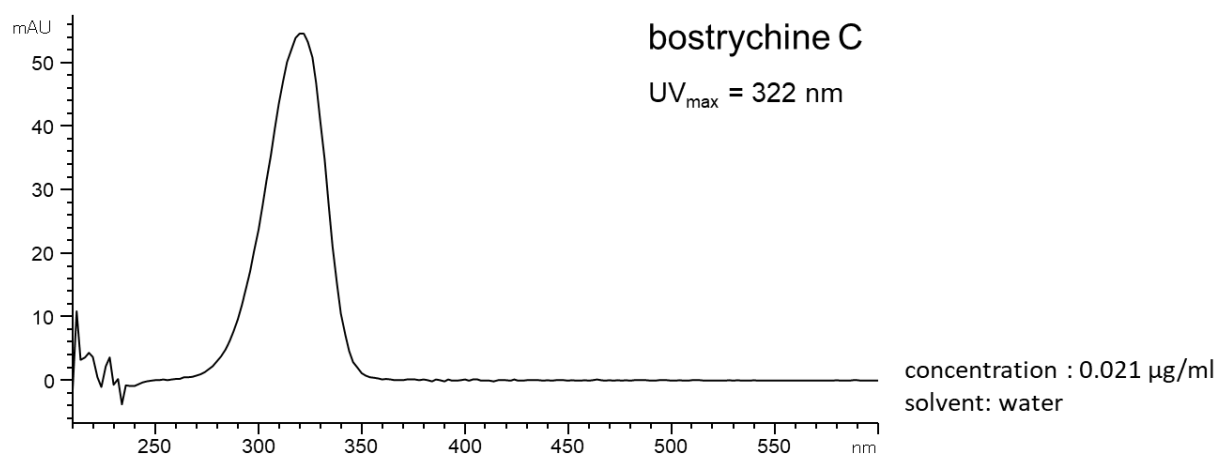

Figure S19. UV spectrum of bostrychine C

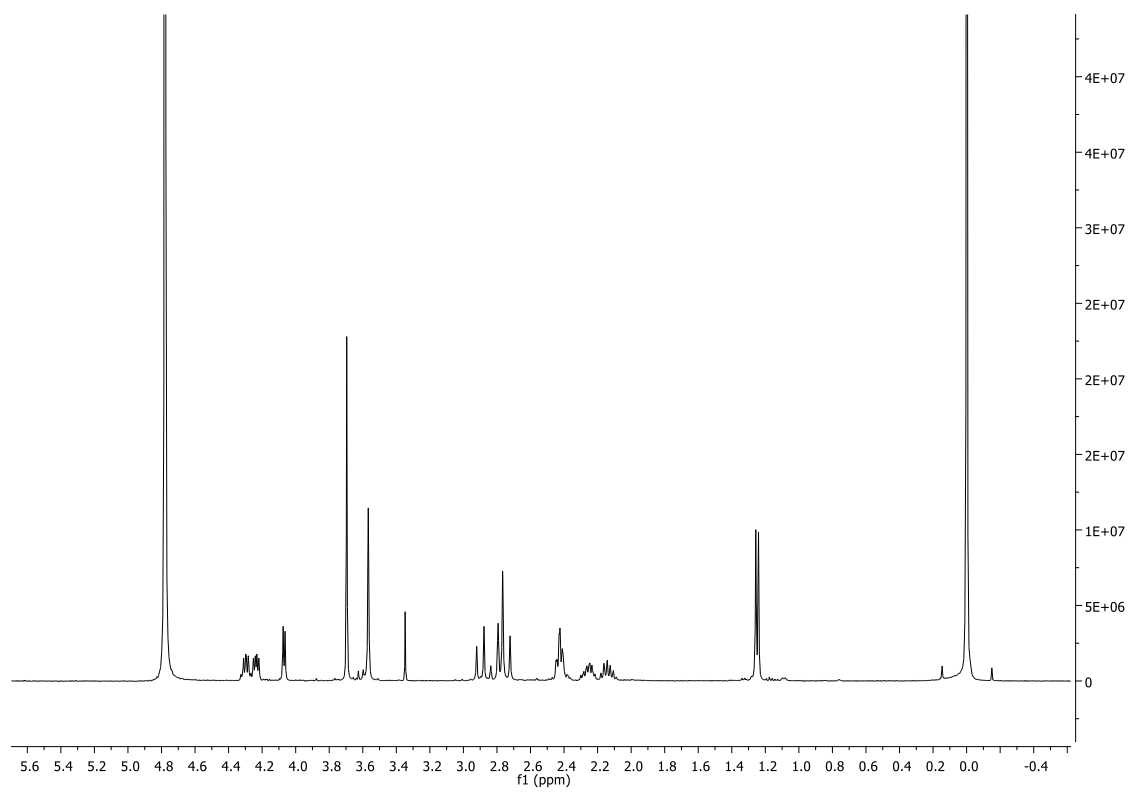

Figure S20.  $^1\text{H}$  NMR spectrum of bostrychine D in  $\text{D}_2\text{O}$  at 600 MHz

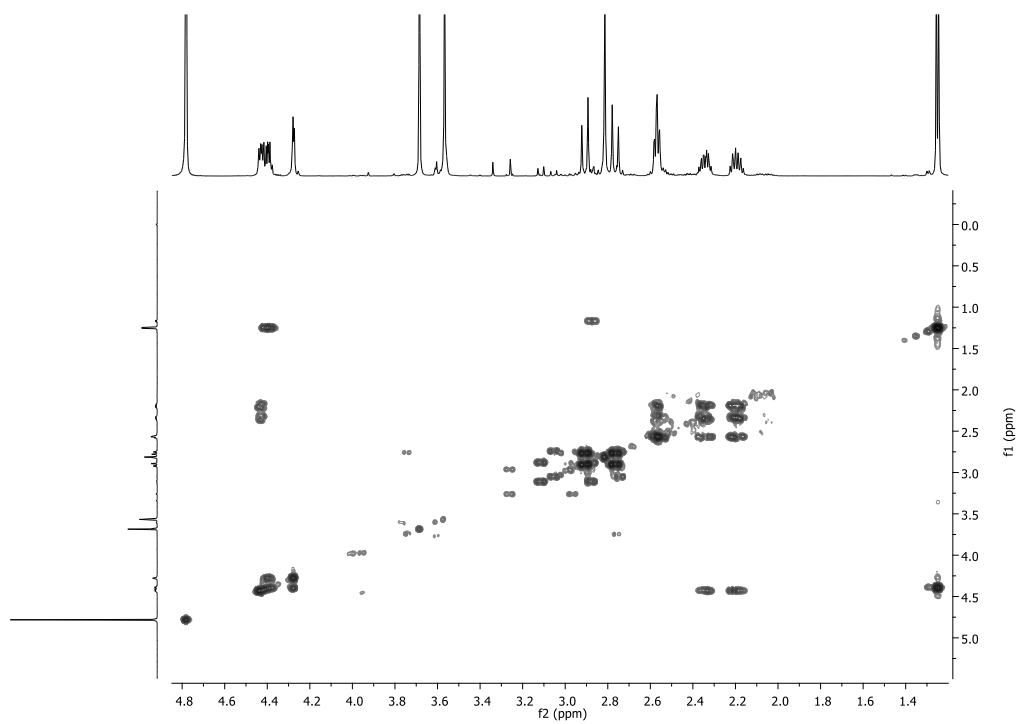

Figure S21. COSY spectrum of bostrychine D in D<sub>2</sub>O at 600 MHz

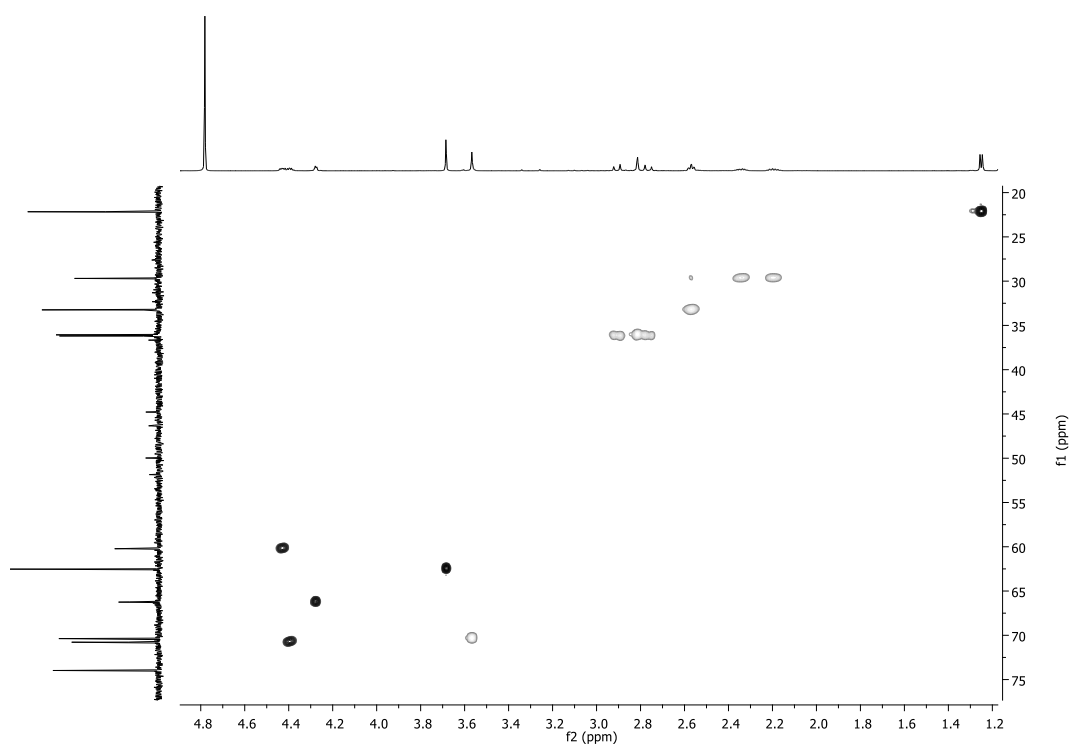

Figure S22. HSQC spectrum of bostrychine D in D<sub>2</sub>O at 600 MHz

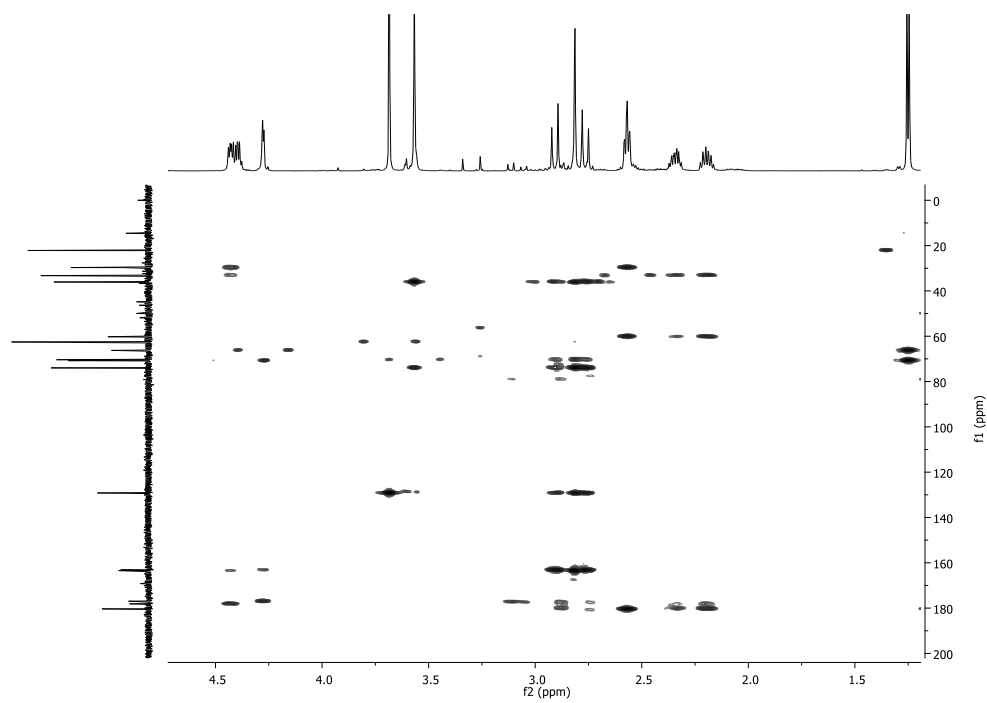

Figure S23. HMBC spectrum of bostrychine D in D<sub>2</sub>O at 600 MHz

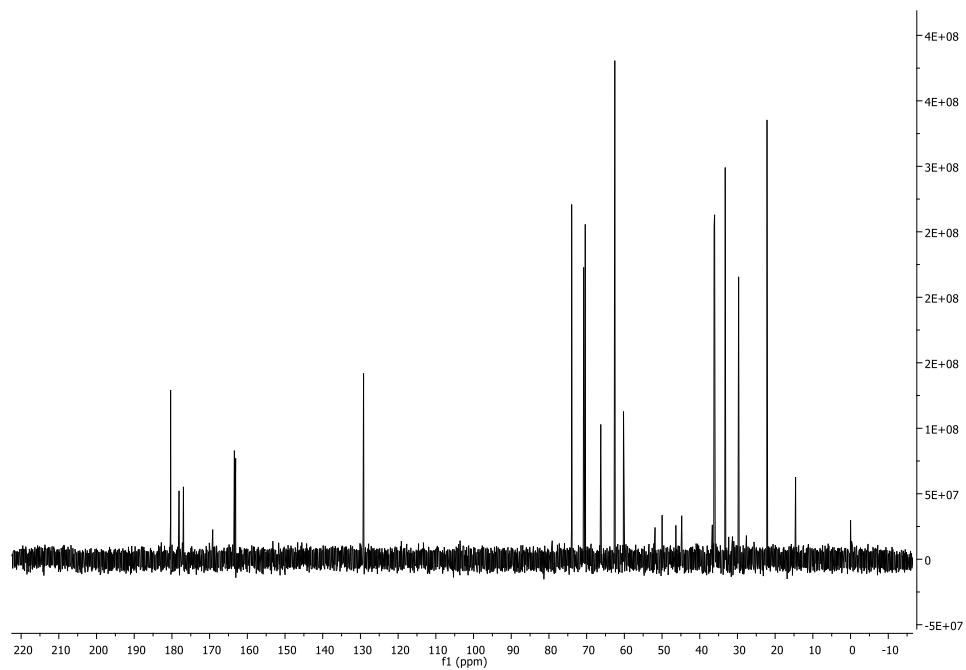

Figure S24. <sup>13</sup>C NMR spectrum of bostrychine D in D<sub>2</sub>O at 150 MHz



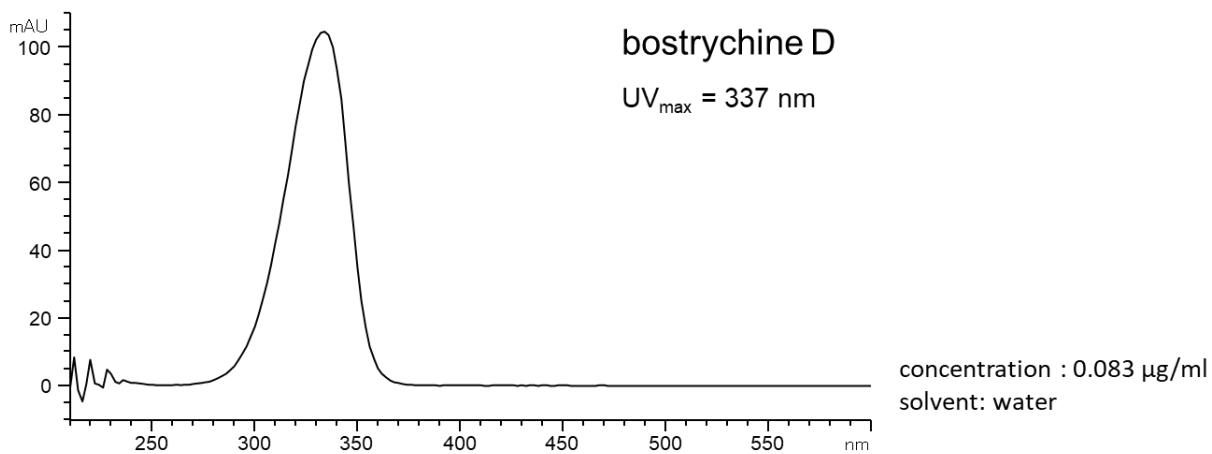

Figure S25. UV spectrum of bostrychine D

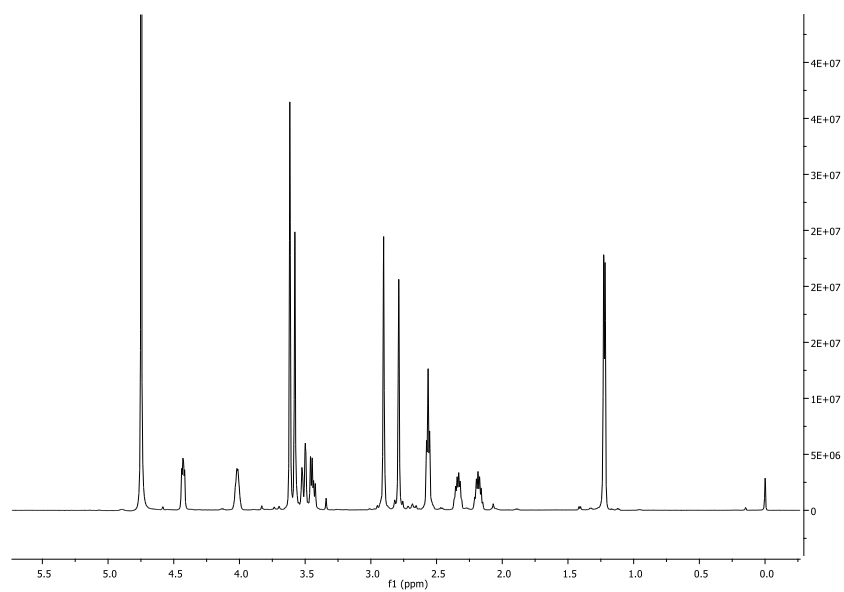

Figure S26.  $^1\text{H}$  NMR spectrum of bostrychine E in  $\text{D}_2\text{O}$  at 600 MHz

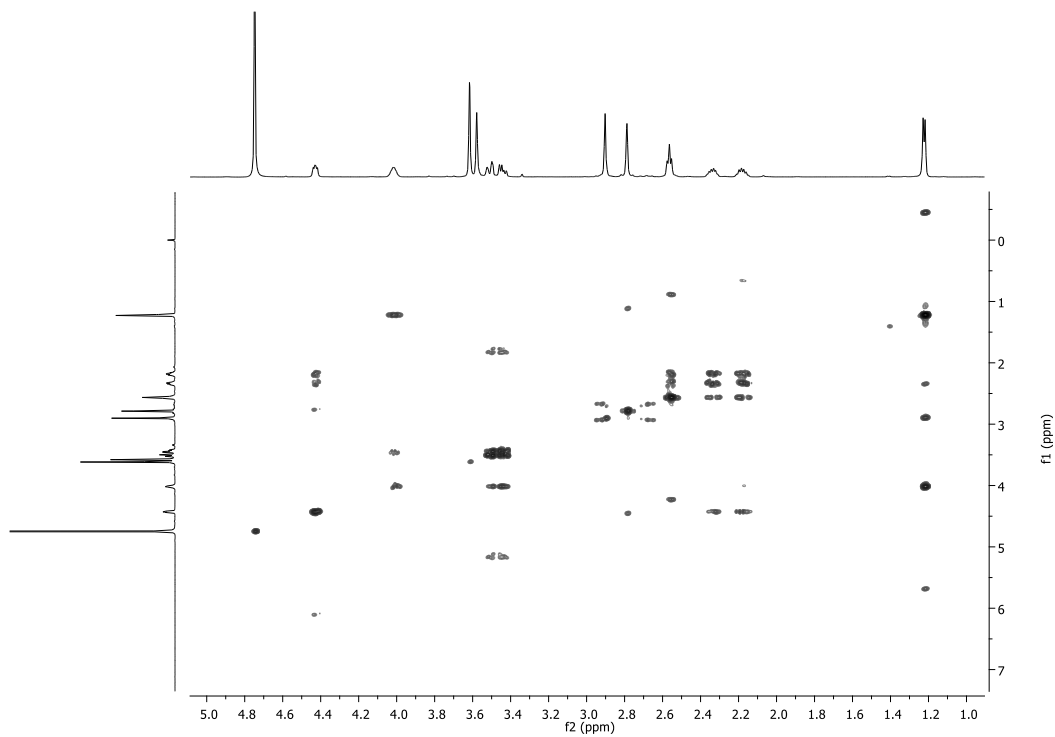

Figure S27. COSY spectrum of bostrychine E in D<sub>2</sub>O at 600 MHz

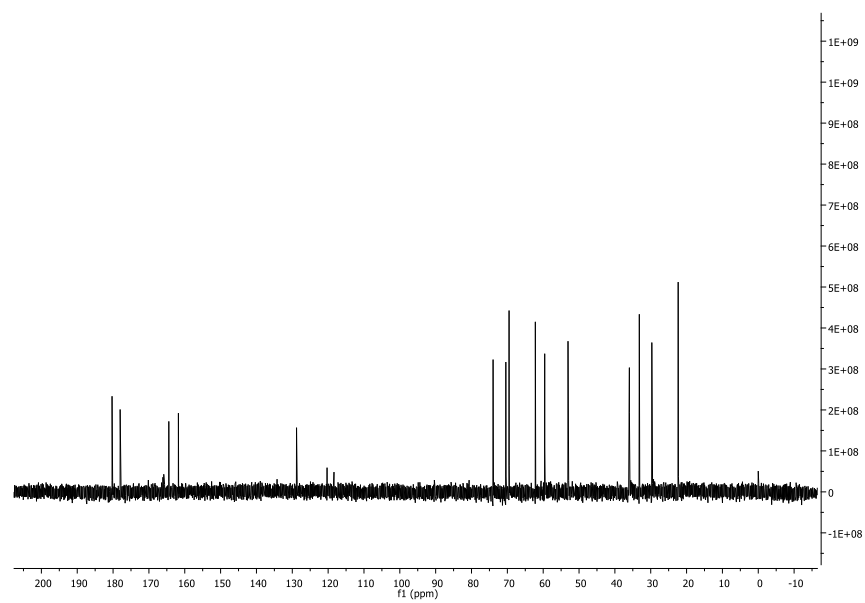

Figure S28. <sup>13</sup>C NMR spectrum of bostrychine E in D<sub>2</sub>O at 150 MHz

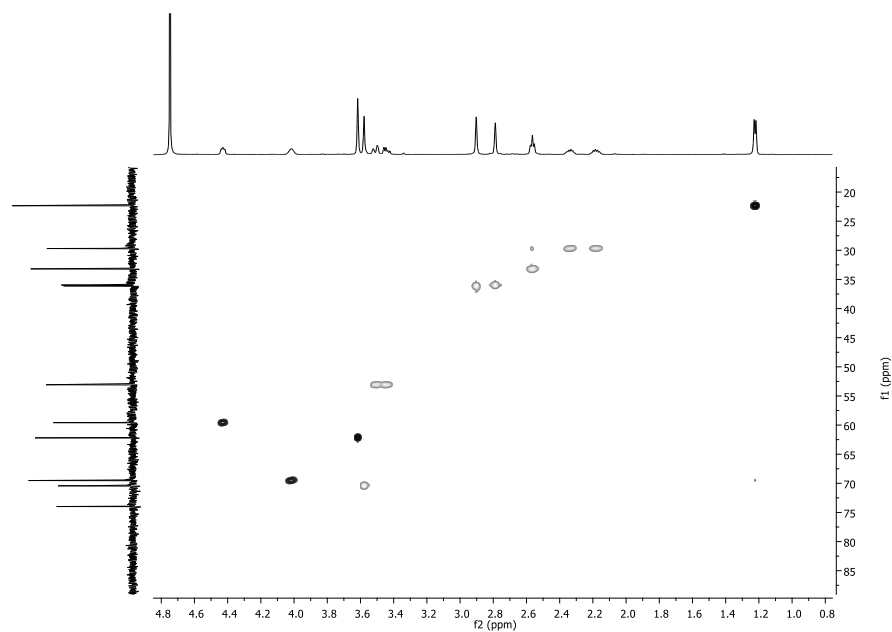

Figure S29. HSQC spectrum of bostrychine E in D<sub>2</sub>O at 600 MHz

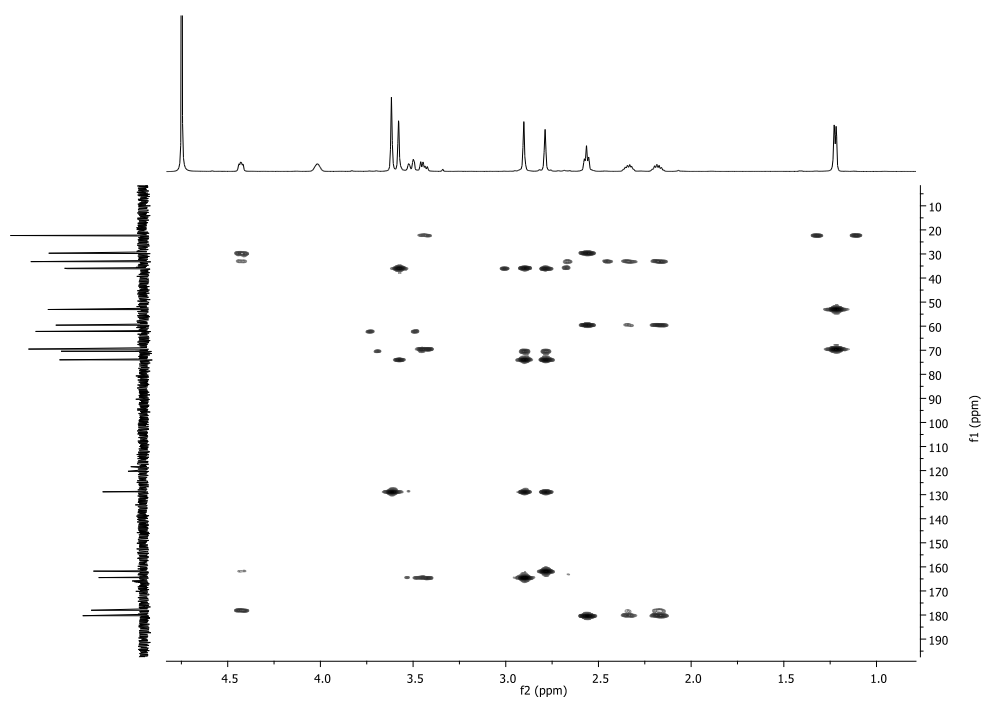

Figure S30. HMBC spectrum of bostrychine E in D<sub>2</sub>O at 600 MHz

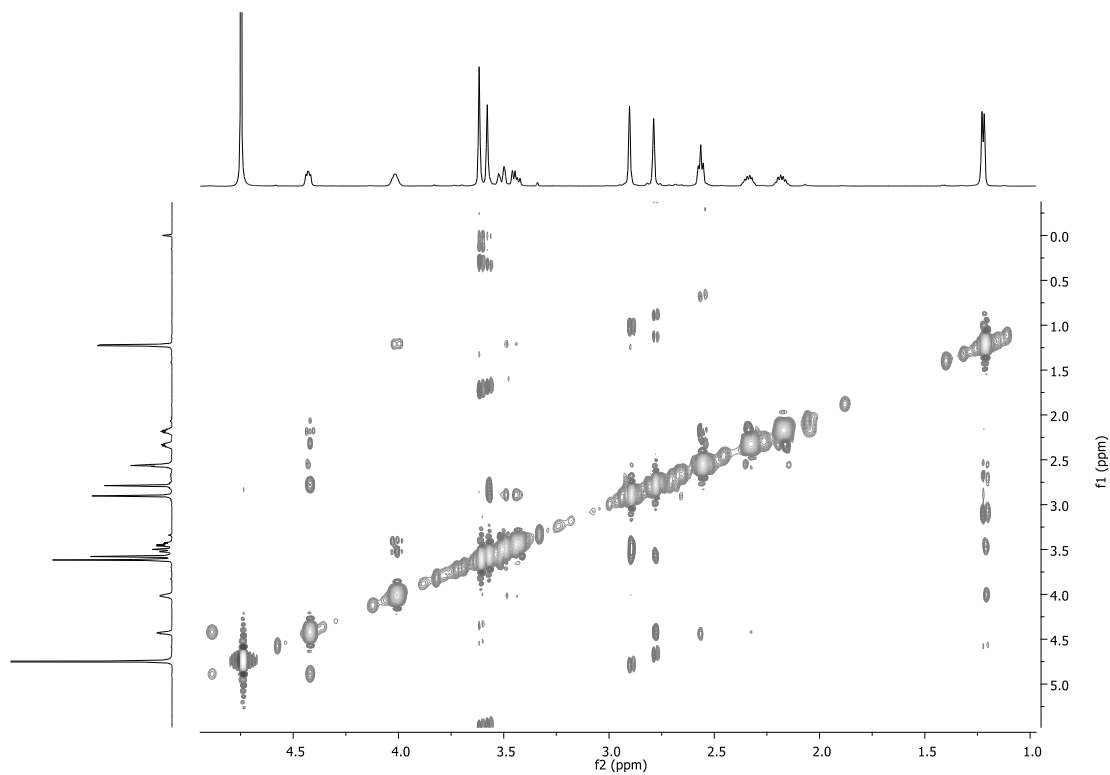

Figure S31. NOESY spectrum of bostrychine E in D<sub>2</sub>O at 600 MHz

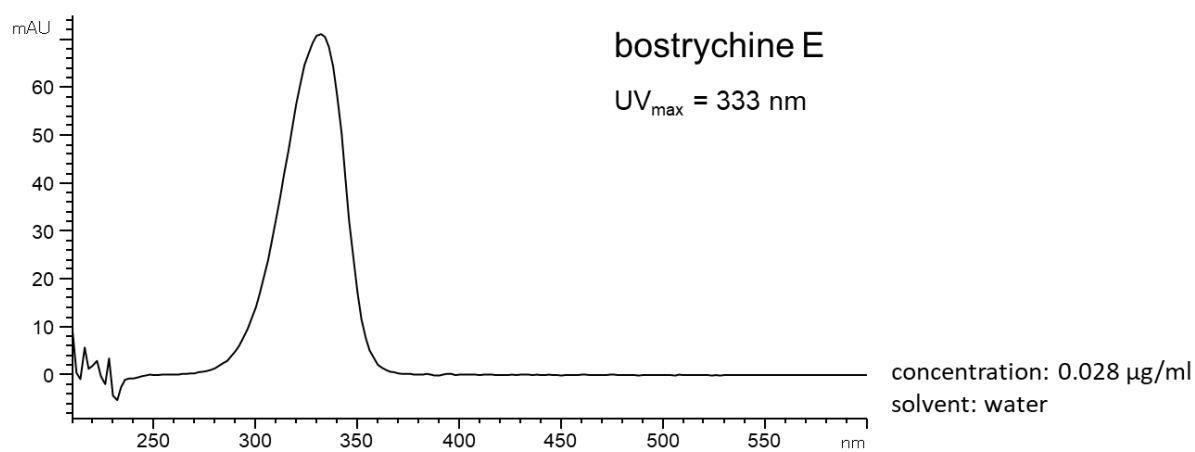

Figure S32. UV spectrum of bostrychine E

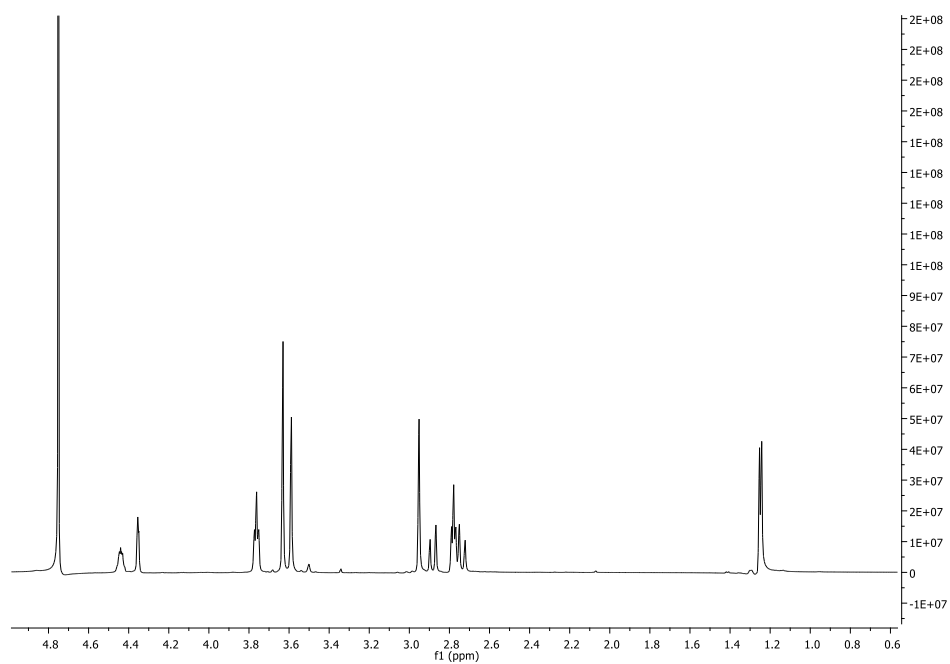

Figure S33.  $^1\text{H}$  NMR spectrum of bostrychine F in  $\text{D}_2\text{O}$  at 600 MHz

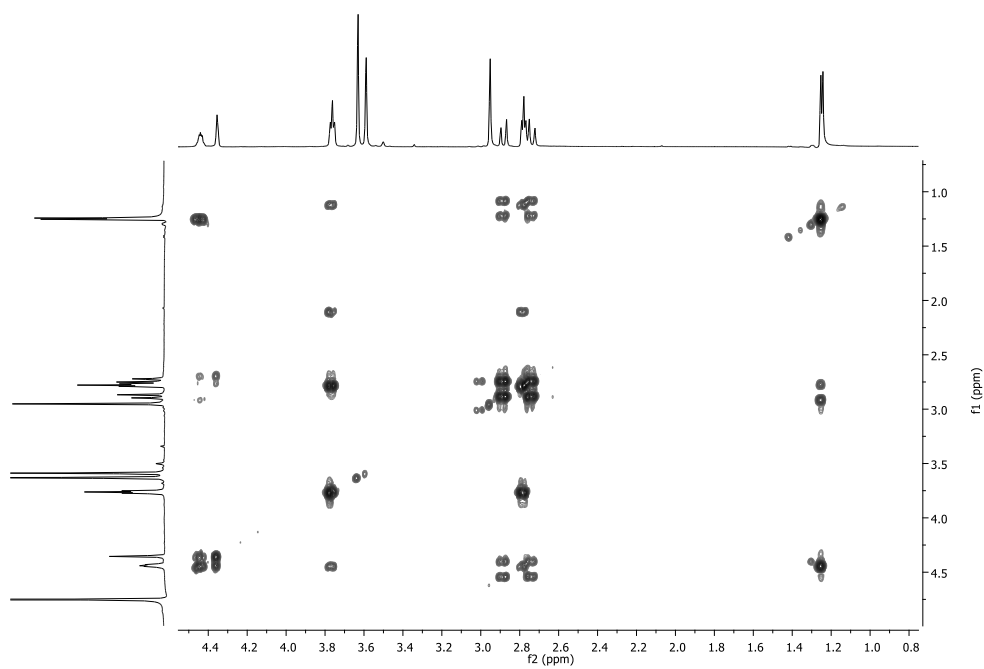

Figure S34. COSY spectrum of bostrychine F in  $\text{D}_2\text{O}$  at 600 MHz

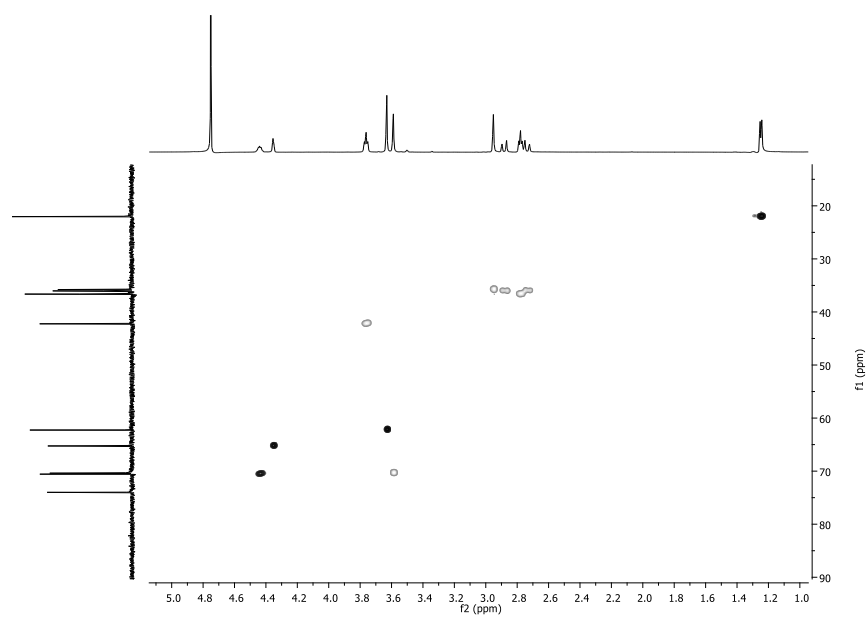

Figure S35. HSQC spectrum of bostrychine F in D<sub>2</sub>O at 600 MHz

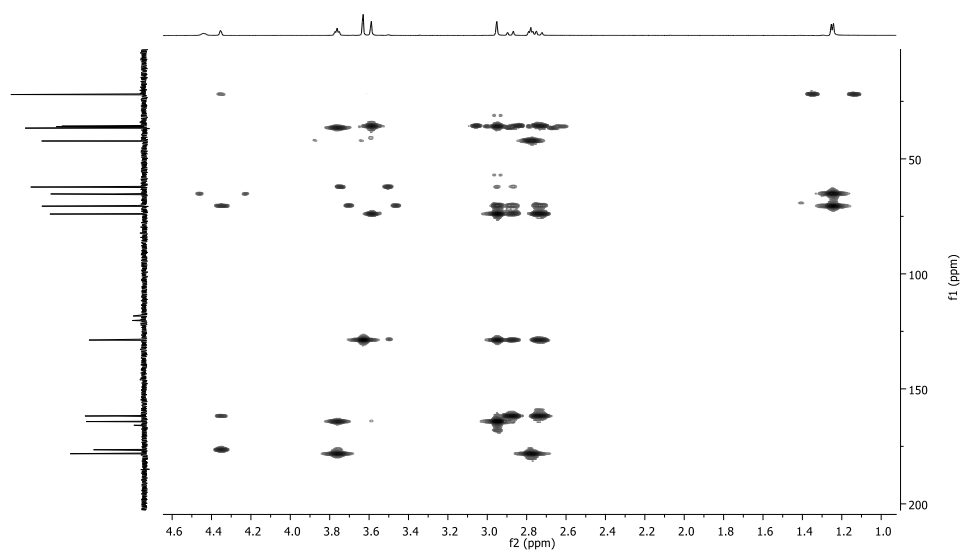

Figure S36. HMBC spectrum of bostrychine F in D<sub>2</sub>O at 600 MHz

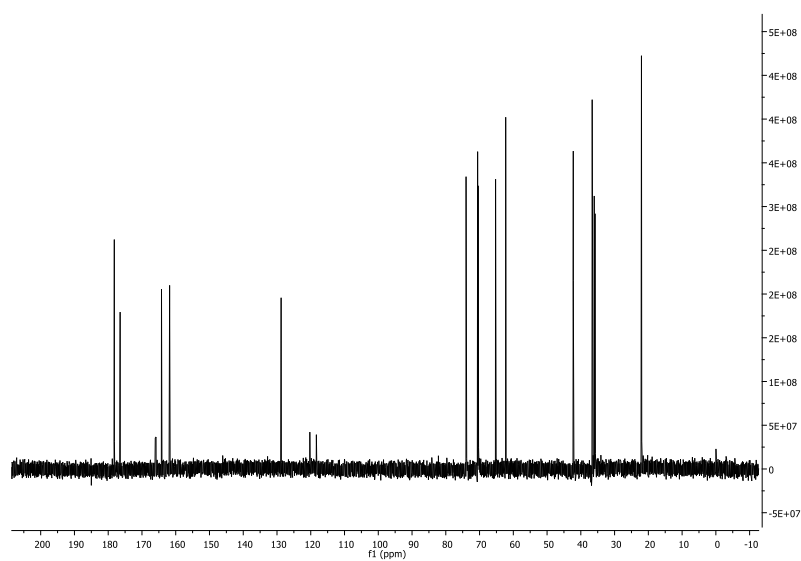

Figure S37  $^{13}\text{C}$  NMR spectrum of bostrychine F in  $\text{D}_2\text{O}$  at 150 MHz

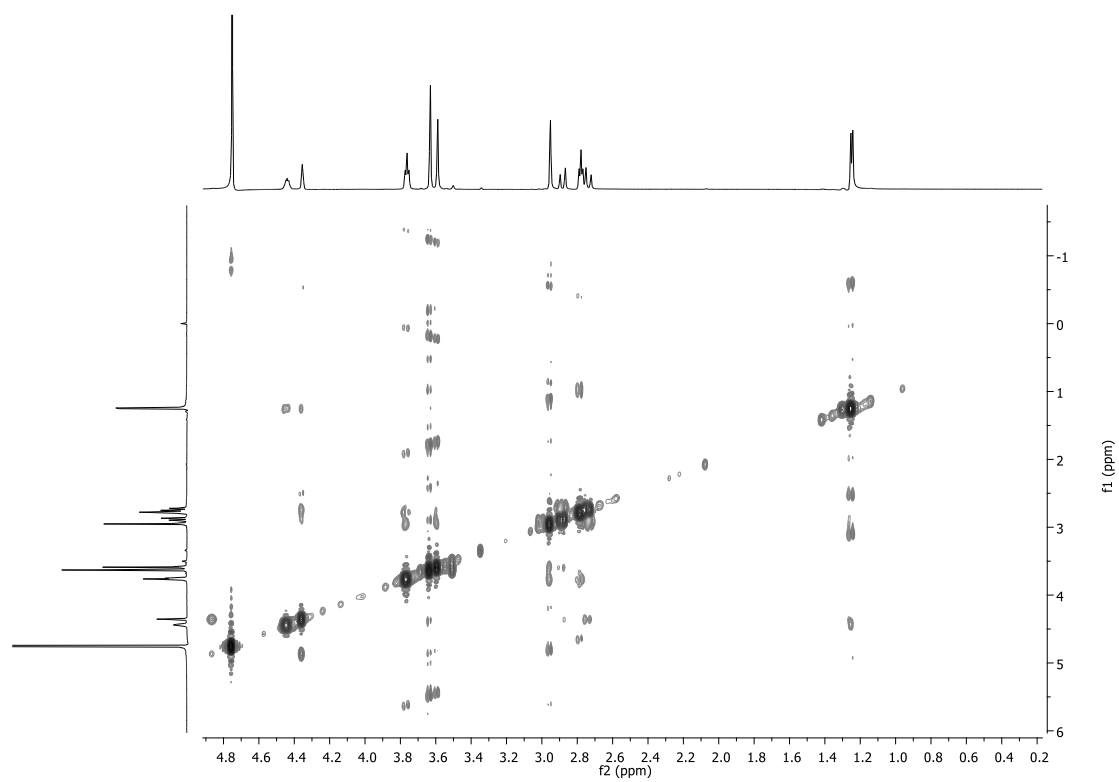

Figure S38. NOESY spectrum of bostrychine F in  $\text{D}_2\text{O}$  at 600 MHz

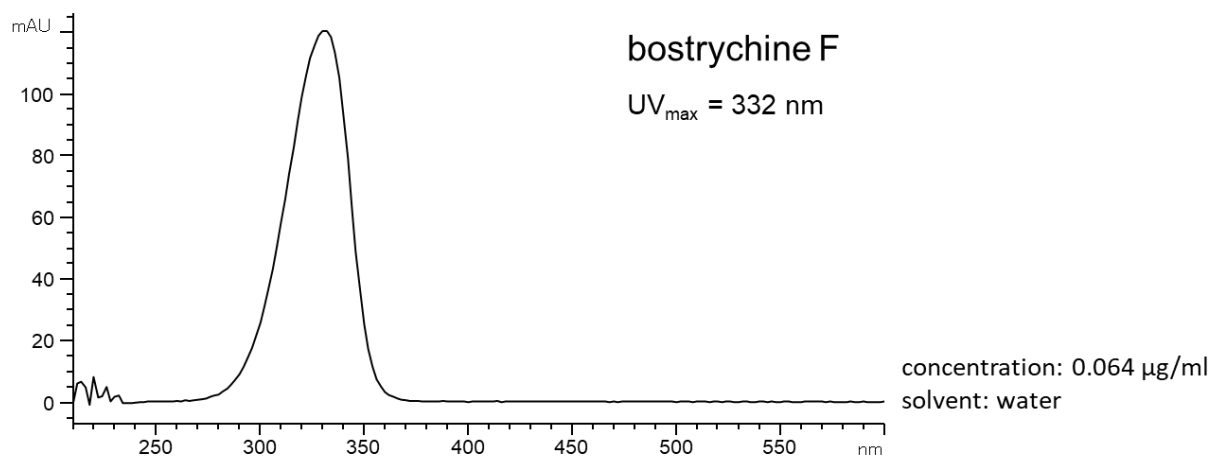

Figure S39.UV spectrum of bostrychine F
